# Supplementary material for: 2-Methyltetrahydrofuran as a suitable green solvent for phthalimide functionalization promoted by supported KF
Source: Royal Society of Chemistry journal article supplement (doi:10.1039/c0gc00113a), 2010-01-01
Supplement: c0gc00113a.pdf [file c0gc00113a.pdf]

## Supporting Information

For

# 2-Methyltetrahydrofuran as a suitable green solvent for phthalimide functionalization promoted by supported KF.

Vittorio Pace,<sup>a</sup> Pilar Hoyos,<sup>a</sup> María Fernández,<sup>a</sup> José V. Sinisterra,<sup>a,b</sup> and Andrés R. Alcántara<sup>\*a</sup>

<sup>a</sup>Organic and Pharmaceutical Chemistry Department, Faculty of Pharmacy, Universidad Complutense de Madrid, Plaza de Ramón y Cajal s/n, 28040 Madrid, Spain.

<sup>b</sup>Industrial Biotransformations Service, Scientific Park of Madrid, C/Santiago Grisolia 2, 28760 Tres Cantos, Madrid, Spain.

\*Corresponding Author: Email: andresr@farm.ucm.es; Fax: +34 913941822; Tel: +345 913941820.

## Materials and Instrumentation.

All experiments were carried out under a nitrogen atmosphere, using glassware, which was previously oven and/or flame-dried. Anhydrous 2-methyltetrahydrofuran was a gift from Penn A Kem LCC, Memphis, Tennessee (USA). All other chemicals were obtained from commercial suppliers and used without purification. 2-Chloro-3-iodopropene was prepared as previously we reported.<sup>1</sup>

All <sup>1</sup>H NMR, <sup>13</sup>C NMR, were recorded on a Bruker AC-250 spectrometer at room temperature at 250 MHz and at 62.5 MHz respectively, using a convenient deuterated solvent (reported in the characterization charts) and the residual peak as internal standard TMS in the case of CDCl<sub>3</sub>. Chemical shifts are reported in δ (ppm) referred to <sup>1</sup>H (of residual protons) of the deuterated solvents. Spin-spin coupling constants (*J*) are given in Hz. Carbon multiplicities were obtained from DEPT experiments. Whenever necessary NMR-2D experiments such as HMBC and HMQC were carried out. Melting points were determined with a Buchi SMP-20 apparatus and are uncorrected. IR absorption spectra were recorded on a Perkin-Elmer System 2000 FT-IR spectrophotometer. Optical rotations were measured at 25 °C using a Perkin-Elmer 241MC polarimeter set on the sodium D line. Elementary microanalyses were carried out in the corresponding 'Centro de Apoyo a la Investigación' of the Complutense University, Madrid, using a Leco<sup>®</sup> CHNS 932 equipment. HPLC analysis for determination of the enantiomeric excess (*ee*) and the absolute configurations were

carried out using a ConstaMetric 4100 system equipped with a chiral column (Chiracel AD), UVvis detector and a Knauer chiral detector. Column chromatography purifications were conducted on silica gel 60 (40-63  $\mu\text{m}$ ). TLC was carried out on aluminium sheets precoated with silica gel 60F<sub>254</sub> (Macherey-Nagel, Merk); the spots were visualized under UV light ( $\lambda=254$  nm) and/or I<sub>2</sub> was used as revealing system.

### ***General Procedure for KF-supported Catalyzed Alkylation of Phthalimides***

In a typical reaction, to a suspension containing KF-supported (1.50 mmol) in 2-methyltetrahydrofuran (5.0 mL), phthalimide derivative (1.20 mmol) and alkylating agent (1.00 mmol) were added. Thus, the mixture was refluxed under nitrogen for the appropriate time until TLC analysis detected the disappearance of the starting material. After cooling, undissolved solid was removed by filtration and washed twice with dichloromethane. Solvent was evaporated under vacuum and the product was purified, whenever necessary, by column chromatography on silica gel, using eluents as reported below, to afford the desired adduct.

#### ***N*-benzylphthalimide (1).**

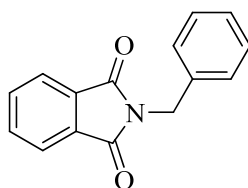

Reaction time: 6 h; Colorless needle; mp 111-113 °C (lit.,<sup>2</sup> 112 °C); LC eluent: dichloromethane; 98 % yield.

<sup>1</sup>H NMR (250 MHz, CDCl<sub>3</sub>)  $\delta$  (ppm): 4.87 (s, 2H, NCH<sub>2</sub>), 7.25-7.42 (m, 5H, Ph-H), 7.68 (dd,  $J = 1.8$  Hz,  $J = 8.1$  Hz, 2H, Ar-H), 7.83 (dd,  $J = 1.9$  Hz,  $J = 8.1$  Hz, 2H, Ar-H).

<sup>13</sup>C NMR (62.5 MHz, CDCl<sub>3</sub>)  $\delta$  (ppm): 41.8 (NCH<sub>2</sub>), 123.3 (C<sub>2a</sub>, C<sub>6a</sub>-Ar), 127.8 (*p*-Ph), 128.7 (*o*-Ph), 129.0 (*m*-Ph), 132.2 (C<sub>4</sub>, C<sub>5</sub>-Ar), 133.9 (C<sub>3</sub>, C<sub>6</sub>-Ar), 136.4 (*ipso*-Ph), 168.0 (NCO).

**FT-IR** (KBr) ( $\nu_{\max}/\text{cm}^{-1}$ ): 3058, 2917, 1674, 1648, 1611, 1472, 1346, 1232, 762, 732.

**Anal. Calcd** for  $\text{C}_{15}\text{H}_{11}\text{NO}_2$ : C, 75.94; H, 4.67; N, 5.90. Found: C, 76.00; H, 4.71; N, 5.86.

### ***N*-allylphthalimide (2a)**

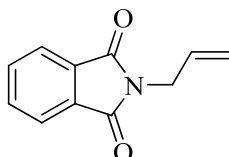

Reaction time: 4 h; Colorless solid; mp 70 °C (lit.,<sup>2</sup> 69-71 °C); LC eluent: dichlorometane; 95 % yield.

**<sup>1</sup>H NMR** (250 MHz,  $\text{CDCl}_3$ )  $\delta$  (ppm): 4.23 (d, 2H,  $J = 5.5$  Hz,  $\text{CH}_2$ ), 5.16 (dd, 2H,  $J = 10.2$  Hz,  $J = 17.4$  Hz,  $\text{CH}=\text{CH}_2$ ), 5.82 (ddt, 1H,  $J = 5.5$  Hz,  $J = 10.2$  Hz,  $J = 17.4$  Hz,  $\text{CHCH}_2$ ), 7.67 (dd,  $J = 1.9$  Hz,  $J = 8.3$  Hz, 2H, Ar-*H*), 7.85 (dd,  $J = 1.9$  Hz,  $J = 8.3$  Hz, 2H, Ar-*H*).

**<sup>13</sup>C NMR** (62.5 MHz,  $\text{CDCl}_3$ )  $\delta$  (ppm): 39.9 ( $\text{CH}_2$ ), 117.5 ( $\text{CH}=\text{CH}_2$ ), 123.1 ( $\text{CH}=\text{CH}_2$ ), 131.4 ( $\text{C}_4$ ,  $\text{C}_5$ -Ar), 131.9 ( $\text{C}_{2a}$ ,  $\text{C}_{6a}$ -Ar), 133.8 ( $\text{C}_3$ ,  $\text{C}_6$ -Ar), 167.7 (NCO).

**FT-IR** (KBr) ( $\nu_{\max}/\text{cm}^{-1}$ ): 3050, 2913, 1670, 1644, 1595, 1366, 995.

**Anal. Calcd** for  $\text{C}_{11}\text{H}_9\text{NO}_2$ : C, 70.58; H, 4.85; N, 7.48. Found: C, 70.51; H, 4.89; N, 7.53.

### ***N*-(3-methylbut-2-enyl)phthalimide (2b)**

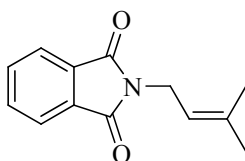

Reaction time: 4 h; Colorless solid; mp 192 °C (lit.,<sup>3</sup> 192-195 °C); LC eluent: dichlorometane / hexanes 4:1; 93 % yield.

**<sup>1</sup>H NMR** (250 MHz, CDCl<sub>3</sub>) δ (ppm): 1.77 (s, 3H, CH<sub>3</sub>), 1.80 (s, 3H, CH<sub>3</sub>), 3.45 (bs, 1H, NH), 3.73 (d, *J* = 6.7 Hz, 2H, NCH<sub>2</sub>), 5.34-5.44 (m, 1H, CH<sub>2</sub>CH=C), 7.68 (dd, *J* = 1.9 Hz, *J* = 8.2 Hz, 2H, Ar-*H*), 7.81 (dd, *J* = 1.8 Hz, *J* = 8.2 Hz, 2H, Ar-*H*).

**<sup>13</sup>C NMR** (62.5 MHz, CDCl<sub>3</sub>) δ (ppm): 17.9 (CH<sub>3</sub>), 25.7 (CH<sub>3</sub>), 41.9 (CH<sub>2</sub>), 121.5 (CH<sub>2</sub>CH=C), 131.4 (C<sub>4</sub>, C<sub>5</sub>-Ar), 135.5 (CH=C(CH<sub>3</sub>)<sub>2</sub>), 117.5 (CH=CH<sub>2</sub>); 123.1 (CH=CH<sub>2</sub>), 133.2 (C<sub>2a</sub>, C<sub>6a</sub>-Ar), 135.3 (C<sub>3</sub>, C<sub>6</sub>-Ar), 168.7 (NCO).

**FT-IR** (KBr) (ν<sub>max</sub>/cm<sup>-1</sup>): 3064, 2914, 1682, 1613, 1352, 1504, 1223, 893, 767, 738.

**Anal. Calcd** for C<sub>13</sub>H<sub>13</sub>NO<sub>2</sub>: C, 72.54; H, 6.09; N, 6.51. Found: C, 72.50; H, 6.13; N, 6.47.

### ***N*-(2-chloroallyl)phthalimide (2c)**

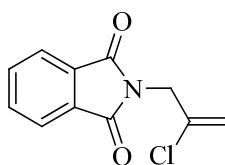

Reaction time: 5.5 h; Colorless solid; mp 141 °C (lit.,<sup>4</sup> 140-145 °C); LC eluent: dichlorometane / hexanes 9:1; 84 % yield.

**<sup>1</sup>H NMR** (250 MHz, CDCl<sub>3</sub>) δ (ppm): 4.48 (s, 2H), 5.35 (dd, *J* = 1.2 Hz, *J* = 2.7 Hz, 1H, ClC=CHH), 5.46 (dd, *J* = 1.5 Hz, *J* = 3.1 Hz, 1H, ClC=CHH), 7.74-7.90 (m, 4H).

**<sup>13</sup>C NMR** (62.5 MHz, CDCl<sub>3</sub>) δ (ppm): 43.4 (CH<sub>2</sub>); 114.6 (C=CH<sub>2</sub>); 123.6 (C<sub>3</sub>, C<sub>6</sub>-Ar);, 131.8 (C<sub>2a</sub>, C<sub>6a</sub>-Ar),, 134.3 (C<sub>4</sub>, C<sub>5</sub>-Ar), 135.5 (ClC=CH<sub>2</sub>), 167.4 (NCO).

**FT-IR** (NaCl) (ν<sub>max</sub>/cm<sup>-1</sup>): 3055, 2915, 1683, 1646, 1604, 1506, 1323, 1267, 889.

**Anal. Calcd** for C<sub>11</sub>H<sub>8</sub>ClNO<sub>2</sub>: C, 59.61; H, 3.64; N, 6.32. Found: C, 59.68; H, 3.70; N, 6.40.

### ***N*-(2-bromoallyl)phthalimide (2d)**

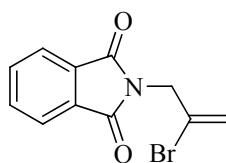

Reaction time: 6.5 h; Colorless solid; mp 126 °C (lit.,<sup>5</sup> 125-126 °C); LC eluent: dichlorometane / hexanes 8:2; 88 % yield.

<sup>1</sup>H NMR (250 MHz, CDCl<sub>3</sub>) δ (ppm): 4.41 (s, 2H, NCH<sub>2</sub>), 5.64 (s, 1H, BrC=CHH), 5.93 (s, 1H, BrC=CHH), 7.76-7.97 (m, 4H);

<sup>13</sup>C NMR (62.5 MHz, CDCl<sub>3</sub>) δ (ppm): 51.4 (NCH<sub>2</sub>), 116.1 (BrC=CH<sub>2</sub>), 123.6 (C<sub>3</sub>, C<sub>6</sub>-Ar); 130.5 (BrC=CH<sub>2</sub>), 132.1 (C<sub>2a</sub>, C<sub>6a</sub>-Ar), 134.7 (C<sub>4</sub>, C<sub>5</sub>-Ar), 168.4 (NCO).

FT-IR (KBr) (v<sub>max</sub>/cm<sup>-1</sup>): 3051, 2912, 1680, 1647, 1606, 1501, 1320, 1269, 893.

Anal. Calcd for C<sub>11</sub>H<sub>8</sub>BrNO<sub>2</sub>: C, 49.65; H, 3.03; N, 5.26. Found: C, 49.70; H, 3.10; N, 5.21.

#### ***N*-(2-methylallyl)phthalimide (2e)**

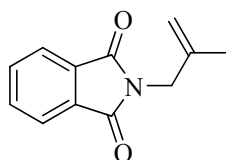

Reaction time: 7 h; Colorless solid; mp 86 °C (lit.,<sup>6</sup> 87-88 °C); LC eluent: dichlorometane / hexanes 8:2; 87 % yield.

<sup>1</sup>H NMR (250 MHz, CDCl<sub>3</sub>) δ (ppm): 1.77 (s, 3H, CH<sub>3</sub>); 4.21 (s, 2H, NCH<sub>2</sub>); 4.80 (s, 1H, CH<sub>2</sub>); 4.88 (s, 1H, CH<sub>2</sub>); 7.61 (dd, *J* = 1.7 Hz, *J* = 8.0 Hz, 2H, Ar-*H*), 7.85 (dd, *J* = 1.7 Hz, *J* = 8.0 Hz, 2H, Ar-*H*).

<sup>13</sup>C NMR (62.5 MHz, CDCl<sub>3</sub>) δ (ppm): 20.4 (CH<sub>3</sub>), 43.2 (NCH<sub>2</sub>), 111.9 (CH<sub>3</sub>C=CH<sub>2</sub>); 123.6 (C<sub>3</sub>, C<sub>6</sub>-Ar), 132.1 (C<sub>2a</sub>, C<sub>6a</sub>-Ar), 134.7 (C<sub>4</sub>, C<sub>5</sub>-Ar), 139.3 (CH<sub>3</sub>C=CH<sub>2</sub>), 167.7 (NCO).

FT-IR (KBr) (v<sub>max</sub>/cm<sup>-1</sup>): 3061, 2913, 1682, 1645, 1606, 1504, 1323, 1272, 897.

Anal. Calcd for C<sub>12</sub>H<sub>11</sub>NO<sub>2</sub>: C, 71.63; H, 5.51; N, 6.96. Found: C, 71.56; H, 5.44; N, 7.01.

#### ***N*-(cyclohexyl)phthalimide (3a)**

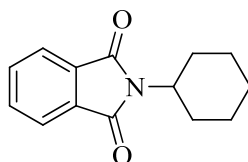

Reaction time: 12 h; Colorless solid; mp 171 °C (lit.,<sup>7</sup> 170-172 °C); LC eluent: dichlorometane / petroleum ether 4:1; 89 % yield.

**<sup>1</sup>H NMR** (250 MHz, CDCl<sub>3</sub>) δ (ppm): 1.22-1.42 (m, 3H), 1.68-1.74 (m, 3H), 1.86 (d, *J* = 13.2 Hz, 2H), 2.15-2.25 (m, 2H), 4.07-4.15 (m, 1H), 7.68-7.70 (m, 2H), 7.80-7.82 (m, 2H).

**<sup>13</sup>C NMR** (62.5 MHz, CDCl<sub>3</sub>) δ (ppm): 25.3 (C<sub>3</sub>, C<sub>5</sub>-Cy), 26.2 (C<sub>4</sub>-Cy), 30.0 (C<sub>2</sub>, C<sub>6</sub>-Cy), 51.0 (C<sub>1</sub>-Cy), 123.1 (C<sub>3</sub>, C<sub>6</sub>-Ar), 132.2 (C<sub>2a</sub>, C<sub>6a</sub>-Ar), 133.8 (C<sub>4</sub>, C<sub>5</sub>-Ar), 168.6 (NCO).

**FT-IR** (KBr) (ν<sub>max</sub>/cm<sup>-1</sup>): 3056, 2912, 1682, 1645, 1616, 1508, 1352, 1223, 1053, 767, 737.

**Anal. Calcd** for C<sub>14</sub>H<sub>15</sub>NO<sub>2</sub>: C, 73.34; H, 6.59; N, 6.11. Found: C, 73.39; H, 6.64; N, 6.17.

### ***N*-(isopropyl)phthalimide (3c)**

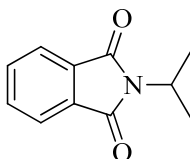

Reaction time: 8 h; Colorless needle; mp 83 °C (lit.,<sup>8</sup> 82-85 °C); LC eluent: chloroform / petroleum ether 4:1; 76 % yield.

**<sup>1</sup>H NMR** (250 MHz, CDCl<sub>3</sub>) δ (ppm): 1.49 (d, *J* = 6.9 Hz, 6H, CH<sub>3</sub>), 4.53 (m, 1H, N-CH), 7.74 (dd, *J* = 1.9 Hz, *J* = 8.2 Hz, 2H, H<sub>3</sub>, H<sub>6</sub>-Ph), 7.87 (dd, *J* = 1.9 Hz, *J* = 8.2 Hz, 2H, H<sub>4</sub>, H<sub>5</sub>-Ph).

**<sup>13</sup>C NMR** (62.5 MHz, CDCl<sub>3</sub>) δ (ppm): 20.4 (CH<sub>3</sub>), 43.3 (NC-H), 123.2 (C<sub>3</sub>, C<sub>6</sub>-Ar), 132.4 (C<sub>2a</sub>, C<sub>6a</sub>-Ar), 133.7 (C<sub>4</sub>, C<sub>5</sub>-Ar), 168.5 (NCO).

**FT-IR** (KBr) (ν<sub>max</sub>/cm<sup>-1</sup>): 3066, 2913, 1684, 1647, 1616, 1507, 1355, 1226, 1057, 769, 737.

**Anal. Calcd** for C<sub>11</sub>H<sub>11</sub>NO<sub>2</sub>: C, 69.83; H, 5.86; N, 7.40. Found: C, 69.90; H, 5.88; N, 7.33.

**(*R,S*)-1-Chloro-3-phthalimido-propan-2-ol (4a)**

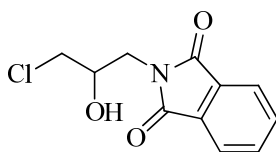

Reaction time: 3 h; Colorless solid; mp 94 °C (lit.,<sup>9</sup> 92-96 °C); LC eluent: dichloromethane / petroleum ether 9:1; 86 % yield.

<sup>1</sup>H NMR (250 MHz, CDCl<sub>3</sub>) δ (ppm): 3.01 (bs, 1H, OH), 3.70 (dd, *J* = 5.2 Hz, *J* = 11.3 Hz, 2H, ClCH<sub>2</sub>), 4.04 (dd, *J* = 14.1 Hz, *J* = 23.3 Hz, 2H, NCH<sub>2</sub>), 4.21-4.30 (m, 1H, CHOH), 3.98-4.11 (m, 1H, CHOH), 7.78 (dd, *J* = 1.9 Hz, *J* = 8.1 Hz, 2H, *H*-Ar), 7.90 (dd, *J* = 1.9 Hz, *J* = 8.2 Hz, 2H, *H*-Ar).

<sup>13</sup>C NMR (62.5 MHz, CDCl<sub>3</sub>) δ (ppm): 41.6 (CH<sub>2</sub>N), 47.3 (CH<sub>2</sub>Cl), 69.8 (CHOH), 123.6 (C<sub>3</sub>, C<sub>6</sub>-Ar), 131.9 (C<sub>2a</sub>, C<sub>6a</sub>-Ar), 134.4 (C<sub>4</sub>, C<sub>5</sub>-Ar), 168.7 (NCO).

FT-IR (KBr) (ν<sub>max</sub> /cm<sup>-1</sup>): 3313, 1772, 1684, 1611, 1350, 1221, 761, 739.

**Anal. Calcd.** for C<sub>11</sub>H<sub>10</sub>ClNO<sub>3</sub>: C, 55.13; H, 4.21; N, 5.84. Found: C, 55.20; H, 4.26; N, 5.91.

**HPLC analysis.** (mobile phase: hexane / propan-2-ol, 90 / 10; flow rate: 1.0 mL/min, λ<sub>max</sub> = 257 nm, t<sub>R</sub> (*S*)-4a = 13.106 min, t<sub>R</sub> (*R*)-4a = 22.643 min).

**(*R,S*)-(2,3-Epoxypropyl)phthalimide (5)**

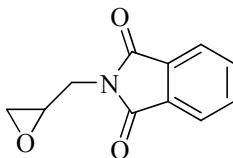

Reaction time: 3 h; Colorless solid; mp 99 °C (lit.,<sup>10</sup> 98-100 °C); LC eluent: dichloromethane / petroleum ether 9:1; 12 % yield.

<sup>1</sup>H NMR (250 MHz, CDCl<sub>3</sub>) δ (ppm): 2.58 (dd, *J* = 2.6 Hz, *J* = 4.9 Hz, 1H, CHH), 2.66 (dd, *J* = 4.1 Hz, *J* = 4.7 Hz, 1H, CHH), 3.19-3.25 (m, 1H, CHO), 3.78 (dd, *J* = 5.7 Hz, *J* = 4.7 Hz, 1H, CHHO), 3.99 (dd, *J* = 5.7 Hz, *J* = 4.7 Hz, 1H, CHHO), 7.78 (dd, *J* = 2.0 Hz, *J* = 8.3 Hz, 2H, *H*-Ar), 7.88 (dd, *J* = 2.0 Hz, *J* = 8.3 Hz, 2H, *H*-Ar).

$^{13}\text{C}$  NMR (62.5 MHz,  $\text{CDCl}_3$ )  $\delta$  (ppm): 42.5 ( $\text{CH}_2\text{N}$ ), 68.8 ( $\text{CH}_2\text{O}$ ), 69.7 ( $\text{CHO}$ ), 122.8 ( $\text{C}_3$ ,  $\text{C}_6\text{-Ar}$ ), 131.0 ( $\text{C}_{2a}$ ,  $\text{C}_{6a}\text{-Ar}$ ), 134.2 ( $\text{C}_4$ ,  $\text{C}_5\text{-Ar}$ ), 166.5 ( $\text{NCO}$ ).

FT-IR (KBr) ( $\nu_{\text{max}}$  / $\text{cm}^{-1}$ ): 1718, 1687, 1615, 1357, 1224, 764, 745.

Anal. Calcd. for  $\text{C}_{11}\text{H}_9\text{NO}_3$ : C, 65.02; H, 4.46; N, 6.89. Found: C, 65.10; H, 4.46; N, 6.93.

**(S)-1-Chloro-3-phthalimido-propan-2-ol (4b)**<sup>11</sup>

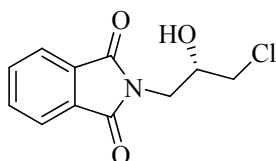

Yield 83 %. Spectroscopic and analytical data are identical to those reported for racemic sample.

$[\alpha]_{\text{D}}^{20} = -14.47$  ( $c = 0.48$ , EtOH).

HPLC analysis. (mobile phase: hexane / propan-2-ol, 90 / 10; flow rate: 1.0 mL/min,  $\lambda_{\text{max}} = 257$  nm,  $t_{\text{R}} = 13.106$  min).

$ee = 95$  %

**(R)-1-Chloro-3-phthalimido-propan-2-ol (4c)**<sup>11</sup>

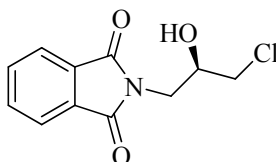

Yield 85%. Spectroscopic and analytical data are identical to those reported for racemic sample.

$[\alpha]_{\text{D}}^{20} = +16.25$  ( $c = 0.48$ , EtOH).

HPLC analysis. (mobile phase: hexane / propan-2-ol, 90 / 10; flow: 1.0 mL/min,  $\lambda_{\text{max}} = 257$  nm,  $t_{\text{R}} = 22.643$  min).

$ee = 92$  %

**1-Methyl-3-nitrophthalimide (6a)**



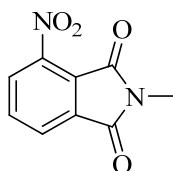

Reaction time: 4 h; Yellow solid; mp 113 °C (lit.,<sup>12</sup> 111-112 °C); LC eluent: dichloromethane / petroleum ether 7:3; 88 % yield.

<sup>1</sup>H NMR (250 MHz, CDCl<sub>3</sub>) δ (ppm): 3.01 (s, 3H, CH<sub>3</sub>), 8.11 (dd, *J* = 7.9 Hz, *J* = 8.3 Hz, 1H, H<sub>5</sub>-Ar), 8.26 (dd, *J* = 2.2 Hz, *J* = 8.3 Hz, 1H, H<sub>6</sub>-Ar), 8.66 (dd, *J* = 2.2 Hz, *J* = 7.9 Hz, 2H, H<sub>4</sub>-Ph).

<sup>13</sup>C NMR (62.5 MHz, CDCl<sub>3</sub>) δ (ppm): 25.6 (CH<sub>3</sub>), 123.2 (C<sub>2a</sub>), 124.2 (C<sub>4</sub>-Ar), 130.1 (C<sub>6</sub>-Ar), 133.5, (C<sub>6a</sub>-Ar), 133.9, (C<sub>5</sub>-Ar), 146.3 (C<sub>3</sub>-Ph), 169.4 (NCO).

FT-IR (KBr) (ν<sub>max</sub>/cm<sup>-1</sup>): 3061, 2919, 1680, 1647, 1606, 1526, 1469, 1308, 1186, 1113, 833, 757.

Anal. Calcd for C<sub>9</sub>H<sub>6</sub>N<sub>2</sub>O<sub>4</sub>: C, 52.43; H, 2.93; N, 13.59. Found: C, 52.50; H, 3.01; N, 13.49.

#### N-allyl-3-nitrophthalimide (6b)

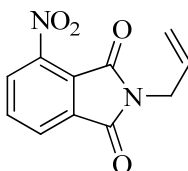

Reaction time: 3.5 h; Yellow solid; mp 133 °C; LC eluent: dichloromethane / ethyl acetate 7:3; 93 % yield.

<sup>1</sup>H NMR (250 MHz, CDCl<sub>3</sub>) δ (ppm): 5.21 (dq, *J* = 1.5 Hz, *J* = 10.1 Hz, 1H, CH=CHH), 5.33 (dq, *J* = 1.5 Hz, *J* = 17.2 Hz, 1H, CH=CHH), 5.40 (s, 2H, NCH<sub>2</sub>), 5.99 (ddt, *J* = 5.3 Hz, *J* = 10.1 Hz, *J* = 17.2 Hz, 1H, CH=CH<sub>2</sub>), 8.11 (dd, *J* = 7.9 Hz, *J* = 8.3 Hz, 1H, H<sub>5</sub>-Ar), 8.26 (dd, *J* = 2.1 Hz, *J* = 8.3 Hz, 1H, H<sub>6</sub>-Ar), 8.69 (dd, *J* = 2.1 Hz, *J* = 7.9 Hz, 2H, H<sub>4</sub>-Ph).

<sup>13</sup>C NMR (62.5 MHz, CDCl<sub>3</sub>) δ (ppm): 44.6 (NCH<sub>2</sub>), 116.7 (CH=CH<sub>2</sub>), 123.5 (C<sub>2a</sub>), 124.6 (C<sub>4</sub>-Ar), 130.4 (C<sub>6</sub>-Ar), 133.8, (C<sub>6a</sub>-Ar), 134.7, (C<sub>5</sub>-Ar), 135.9 (CH=CH<sub>2</sub>), 146.3 (C<sub>3</sub>-Ph), 171.0 (NCO).

FT-IR (KBr) (ν<sub>max</sub>/cm<sup>-1</sup>): 3059, 2914, 1686, 1641, 1616, 1524, 1461, 1318, 1111, 893, 750.

**Anal. Calcd** for C<sub>11</sub>H<sub>8</sub>N<sub>2</sub>O<sub>4</sub>: C, 56.90; H, 3.47; N, 12.06. Found: C, 56.84; H, 3.42; N, 12.18.

***N*-(2-chloroallyl)-3-nitrophthalimide (6c)**

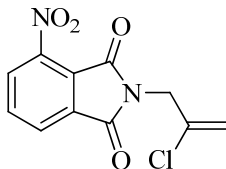

Reaction time: 4 h; Yellow solid; mp 148 °C, LC eluent: dichloromethane / ethyl acetate 9:1; 86 % yield.

**<sup>1</sup>H NMR** (250 MHz, CDCl<sub>3</sub>) δ (ppm): 4.37 (s, 2H, NCH<sub>2</sub>), 5.35 (dd, *J* = 1.2 Hz, *J* = 2.7 Hz, 1H, ClC=CHH), 5.46 (dd, *J* = 1.5 Hz, *J* = 3.1 Hz, 1H, ClC=CHH), 8.16 (dd, *J* = 7.9 Hz, *J* = 8.3 Hz, 1H, *H*<sub>5</sub>-Ar), 8.34 (dd, *J* = 2.1 Hz, *J* = 8.3 Hz, 1H, *H*<sub>6</sub>-Ar), 8.74 (dd, *J* = 2.1 Hz, *J* = 7.9 Hz, 2H, *H*<sub>4</sub>-Ph).

**<sup>13</sup>C NMR** (62.5 MHz, CDCl<sub>3</sub>) δ (ppm): 53.2 (NCH<sub>2</sub>), 111.8 (C=CH<sub>2</sub>), 123.7 (C<sub>2a</sub>), 125.3 (C<sub>4</sub>-Ar), 130.9 (C<sub>6</sub>-Ar), 134.4, (C<sub>6a</sub>-Ar), 135.4, (C<sub>5</sub>-Ar), 135.2 (C=CH<sub>2</sub>), 146.9 (C<sub>3</sub>-Ph), 170.4 (NCO).

**FT-IR** (KBr) (ν<sub>max</sub>/cm<sup>-1</sup>): 3062, 2912, 1676, 1649, 1619, 1526, 1463, 1120, 896, 754.

**Anal. Calcd** for C<sub>11</sub>H<sub>7</sub>ClN<sub>2</sub>O<sub>4</sub>: C, 49.55; H, 2.65; N, 10.51. Found: C, 50.01; H, 2.71; N, 10.58.

***N*-methyl-4-nitrophthalimide (7a)**

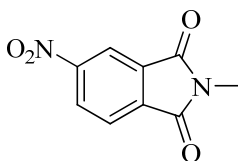

Reaction time: 5 h; Yellow solid; mp 177 °C (lit.,<sup>12</sup> 179-180 °C); LC eluent: dichloromethane / ethyl acetate 8:2; 91 % yield.

**<sup>1</sup>H NMR** (250 MHz, CDCl<sub>3</sub>) δ (ppm): 3.06 (s, 3H, CH<sub>3</sub>), 8.16 (d, *J* = 8.2 Hz, 1H, *H*<sub>6</sub>-Ar), 8.61 (d, *J* = 2.0 Hz, 1H, *H*<sub>3</sub>-Ar), 8.76 (dd, *J* = 2.0 Hz, *J* = 8.2 Hz, 1H, *H*<sub>5</sub>-Ph).

**<sup>13</sup>C NMR** (62.5 MHz, CDCl<sub>3</sub>) δ (ppm): 25.4 (CH<sub>3</sub>), 122.0 (C<sub>3</sub>-Ar), 127.7 (C<sub>5</sub>-Ar), 128.5 (C<sub>6</sub>-Ar), 132.9 (C<sub>2a</sub>-Ar), 138.5 (C<sub>6a</sub>-Ar), 151.0 (C<sub>4</sub>-Ar), 169.4 (NCO).

**FT-IR** (KBr) (ν<sub>max</sub>/cm<sup>-1</sup>): 3058, 2921, 1676, 1650, 1616, 1530, 1458, 1321, 1189, 837.

**Anal. Calcd** for C<sub>9</sub>H<sub>6</sub>N<sub>2</sub>O<sub>4</sub>: C, 52.43; H, 2.93; N, 13.59. Found: C, 52.36; H, 2.90; N, 13.66.

**N-allyl-4-nitrophthalimide (7b)**

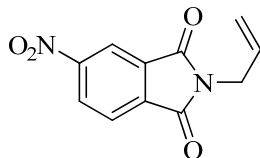

Reaction time: 5 h; Yellow solid; mp 191 °C; LC eluent: dichloromethane / ethyl acetate 7:3; 95 % yield.

**<sup>1</sup>H NMR** (250 MHz, CDCl<sub>3</sub>) δ (ppm): 5.22 (dq, *J* = 1.6 Hz, *J* = 10.1 Hz, 1H, CH=CHH), 5.36 (dq, *J* = 1.6 Hz, *J* = 17.2 Hz, 1H, CH=CHH), 5.40 (s, 2H, NCH<sub>2</sub>), 5.99 (ddt, *J* = 5.3 Hz, *J* = 10.1 Hz, *J* = 17.2 Hz, 1H, CH=CH<sub>2</sub>), 8.13 (d, *J* = 8.1 Hz, 1H, H<sub>6</sub>-Ar), 8.55 (d, *J* = 2.1 Hz, 1H, H<sub>3</sub>-Ar), 8.72 (dd, *J* = 2.1 Hz, *J* = 8.1 Hz, 1H, H<sub>5</sub>-Ph).

**<sup>13</sup>C NMR** (62.5 MHz, CDCl<sub>3</sub>) δ (ppm): 44.9 (NCH<sub>2</sub>), 116.9 (CH=CH<sub>2</sub>), 122.2 (C<sub>3</sub>-Ar), 128.0 (C<sub>5</sub>-Ar), 128.4 (C<sub>6</sub>-Ar), 132.6 (C<sub>2a</sub>-Ar), 135.9 (CH=CH<sub>2</sub>), 138.7 (C<sub>6a</sub>-Ar), 150.4 (C<sub>4</sub>-Ar), 169.9 (NCO).

**FT-IR** (KBr) (ν<sub>max</sub>/cm<sup>-1</sup>): 3062, 1676, 1638, 1616, 1519, 1455, 1320, 1113, 897.

**Anal. Calcd** for C<sub>11</sub>H<sub>8</sub>N<sub>2</sub>O<sub>4</sub>: C, 56.90; H, 3.47; N, 12.06. Found: C, 56.86; H, 3.40; N, 12.12.

**N-(2-chloroallyl)-4-nitrophthalimide (7c)**

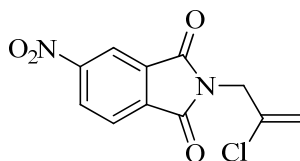

Reaction time: 6 h; Yellow solid; mp 186 °C; LC eluent: dichloromethane / ethyl acetate 8:2; 87 % yield.

**<sup>1</sup>H NMR** (250 MHz, CDCl<sub>3</sub>) δ (ppm): 4.40 (s, 2H, NCH<sub>2</sub>), 5.40 (dd, *J* = 1.1 Hz, *J* = 2.7 Hz, 1H, ClC=CHH), 5.46 (dd, *J* = 1.1 Hz, *J* = 2.7 Hz, 1H, ClC=CHH), 8.16 (d, *J* = 8.1 Hz, 1H, H<sub>6</sub>-Ar), 8.58 (d, *J* = 2.1 Hz, 1H, H<sub>3</sub>-Ar), 8.80 (dd, *J* = 2.1 Hz, *J* = 8.1 Hz, 1H, H<sub>5</sub>-Ph).

$^{13}\text{C}$  NMR (62.5 MHz,  $\text{CDCl}_3$ )  $\delta$  (ppm): 44.9 ( $\text{NCH}_2$ ), 111.9 ( $\text{C}=\text{CH}_2$ ), 122.6 ( $\text{C}_3\text{-Ar}$ ), 128.5 ( $\text{C}_5\text{-Ar}$ ), 128.9 ( $\text{C}_6\text{-Ar}$ ), 133.1 ( $\text{C}_{2a}\text{-Ar}$ ), 138.9 ( $\text{C}=\text{CH}_2$ ), 139.3 ( $\text{C}_{6a}\text{-Ar}$ ), 150.4 ( $\text{C}_4\text{-Ar}$ ), 171.4 ( $\text{NCO}$ ).

**FT-IR** (KBr) ( $\nu_{\text{max}}/\text{cm}^{-1}$ ): 3055, 1675, 1617, 1606, 1523, 1459, 1329, 896.

**Anal. Calcd** for  $\text{C}_{11}\text{H}_7\text{ClN}_2\text{O}_4$ : C, 49.55; H, 2.65; N, 10.51. Found: C, 49.50; H, 2.71; N, 10.61.

### 1,3-Dimethylphthalimide (8a)

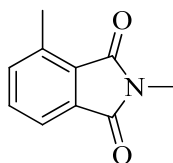

Reaction time: 7 h; Colorless solid; mp 136 °C; LC eluent: chloroform / ethyl ether 8:2; 83 % yield.

$^1\text{H}$  NMR (250 MHz,  $\text{CDCl}_3$ )  $\delta$  (ppm): 2.51 (s, 3H,  $\text{ArCH}_3$ ), 3.08 (s, 3H,  $\text{NCH}_3$ ), 7.50-7.67 (m, 3H,  $H\text{-Ar}$ ).

$^{13}\text{C}$  NMR (62.5 MHz,  $\text{CDCl}_3$ )  $\delta$  (ppm): 16.9 ( $\text{ArCH}_3$ ), 25.9 ( $\text{CH}_3$ ), 120.7 ( $\text{C}_6\text{-Ar}$ ), 132.1 ( $\text{C}_{6a}\text{-Ar}$ ), 132.4 ( $\text{C}_5\text{-Ar}$ ), 134.5 ( $\text{C}_4\text{-Ar}$ ), 137.6 ( $\text{C}_3\text{-Ph}$ ), 147.5 ( $\text{C}_{2a}$ ), 168.5 ( $\text{NCO}$ ) 169.4 ( $\text{NCO}$ ).

**FT-IR** (KBr) ( $\nu_{\text{max}}/\text{cm}^{-1}$ ): 3055, 2912, 1459, 1318, 1189, 1118.

**Anal. Calcd** for  $\text{C}_{10}\text{H}_9\text{NO}_2$ : C, 68.56; H, 5.18; N, 8.00. Found: C, 68.61; H, 5.23; N, 8.07.

### N-allyl-3-methylphthalimide (8b)

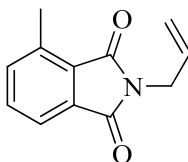

Reaction time: 5 h; Colorless solid; mp 170 °C; LC eluent: chloroform / ethyl ether 7:3; 88 % yield.

$^1\text{H}$  NMR (250 MHz,  $\text{CDCl}_3$ )  $\delta$  (ppm): 2.52 (s, 3H,  $\text{ArCH}_3$ ), 5.26 (dq,  $J = 1.6$  Hz,  $J = 10.1$  Hz, 1H,  $\text{CH}=\text{CHH}$ ), 5.40 (dq,  $J = 1.6$  Hz,  $J = 17.0$  Hz, 1H,  $\text{CH}=\text{CHH}$ ), 5.46 (s, 2H,  $\text{NCH}_2$ ), 5.89 (ddt,  $J = 5.3$  Hz,  $J = 10.1$  Hz,  $J = 17.0$  Hz, 1H,  $\text{CH}=\text{CH}_2$ ), 7.50-7.67 (m, 3H,  $H\text{-Ar}$ ).

$^{13}\text{C}$  NMR (62.5 MHz,  $\text{CDCl}_3$ )  $\delta$  (ppm): 17.5 ( $\text{ArCH}_3$ ), 116.9 ( $\text{CH}=\text{CH}_2$ ), 120.4 ( $\text{C}_6\text{-Ar}$ ), 131.9 ( $\text{C}_{6a}\text{-Ar}$ ), 132.3 ( $\text{C}_5\text{-Ar}$ ), 134.9 ( $\text{C}_4\text{-Ar}$ ), 135.9 ( $\text{CH}=\text{CH}_2$ ), 137.8 ( $\text{C}_3\text{-Ph}$ ), 147.7 ( $\text{C}_{2a}$ ), 169.4 (NCO).

FT-IR (KBr) ( $\nu_{\text{max}}/\text{cm}^{-1}$ ): 3062, 1679, 1638, 1618, 1522, 1449, 1327, 897.

Anal. Calcd for  $\text{C}_{12}\text{H}_{11}\text{NO}_2$ : C, 71.63; H, 5.51; N, 6.96. Found: C, 71.61; H, 5.53; N, 7.07.

### *N*-(2-chloroallyl)-3-methylphthalimide (8c)

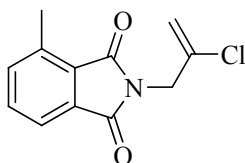

Reaction time: 6 h; Colorless solid; mp 192 °C; LC eluent: dichloromethane / ethyl ether 7:3; 81 % yield.

$^1\text{H}$  NMR (250 MHz,  $\text{CDCl}_3$ )  $\delta$  (ppm): 4.34 (s, 2H,  $\text{NCH}_2$ ), 5.36 (dd,  $J = 1.2$  Hz,  $J = 2.6$  Hz, 1H,  $\text{ClC}=\text{CHH}$ ), 5.50 (dd,  $J = 1.2$  Hz,  $J = 2.6$  Hz, 1H,  $\text{ClC}=\text{CHH}$ ), 7.50-7.67 (m, 3H,  $H\text{-Ar}$ ).

$^{13}\text{C}$  NMR (62.5 MHz,  $\text{CDCl}_3$ )  $\delta$  (ppm): 17.5 ( $\text{ArCH}_3$ ), 44.7 ( $\text{NCH}_2$ ), 111.9 ( $\text{C}=\text{CH}_2$ ), 138.9 ( $\text{C}=\text{CH}_2$ ), 120.6 ( $\text{C}_6\text{-Ar}$ ), 131.8 ( $\text{C}_{6a}\text{-Ar}$ ), 132.5 ( $\text{C}_5\text{-Ar}$ ), 134.8 ( $\text{C}_4\text{-Ar}$ ), 137.8 ( $\text{C}_3\text{-Ph}$ ), 147.7 ( $\text{C}_{2a}$ ), 169.4 (NCO).

FT-IR (KBr) ( $\nu_{\text{max}}/\text{cm}^{-1}$ ): 3056, 1677, 1611, 1601, 1459, 899.

Anal. Calcd for  $\text{C}_{12}\text{H}_{10}\text{ClNO}_2$ : C, 61.16; H, 4.28; N, 5.94. Found: C, 61.21; H, 4.33; N, 6.00.

### (*S*)-2-(3-Chloro-2-hydroxypropyl)-1*H*-benzo[*f*]isoindole-1,3(2*H*)-dione (9)

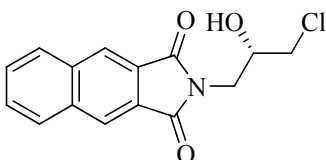

Reaction time: 3 h; Colorless solid; mp 202 °C; LC eluent: dichloromethane / ethyl acetate 9:1; 92 % yield.

**<sup>1</sup>H NMR** (250 MHz, CDCl<sub>3</sub>) δ (ppm): 3.01 (bs, 1H, OH), 3.70 (dd, *J* = 5.2 Hz, *J* = 11.3 Hz, 2H, ClCH<sub>2</sub>), 4.04 (dd, *J* = 14.1 Hz, *J* = 23.3 Hz, 2H, NCH<sub>2</sub>), 4.21-4.30 (m, 1H, CHOH), 3.98-4.11 (m, 1H, CHOH), 7.76 (dd, *J* = 3.3 Hz, *J* = 6.2 Hz, Ar-H), 8.11 (dd, *J* = 3.3 Hz, *J* = 6.2 Hz, Ar-H), 8.41 (s, 2H, Ar-H).

**<sup>13</sup>C NMR** (62.5 MHz, CDCl<sub>3</sub>) δ (ppm): 42.4 (CH<sub>2</sub>N), 47.8 (CH<sub>2</sub>Cl), 70.3 (CHOH), 125.6 (C-Ar), 127.8 (C-Ar), 129.9 (C-Ar), 130.8 (C-Ar) 135.9 (C-Ar), 168.7 (NCO).

**FT-IR** (KBr) ( $\nu_{\max}$  /cm<sup>-1</sup>): 3502, 1773, 1694, 1615.

**Anal. Calcd** for C<sub>15</sub>H<sub>12</sub>ClNO<sub>3</sub>: C, 62.19; H, 4.17; N, 4.83. Found: C, 62.21; H, 4.19; N, 4.90.

$[\alpha]_{\text{D}}^{20}$  = +13.45 (c = 0.50, EtOH).

**HPLC analysis.** (mobile phase: hexane / propan-2-ol, 93 / 7; flux: 1.0 mL/min,  $\lambda_{\max}$  = 257 nm,  $t_R$  = 12.942 min).

*ee* = 94%

### 2-(Oxiran-2-ylmethyl)-1*H*-benzo[*f*]isoindole-1,3(2*H*)-dione (9a)

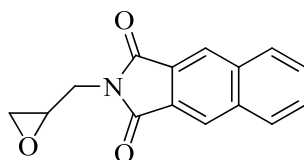

Reaction time: 2 h; Colorless solid; mp 222 °C; LC eluent: dichloromethane / ethyl acetate 9:1; 9 % yield.

**<sup>1</sup>H NMR** (250 MHz, CDCl<sub>3</sub>) δ (ppm): 2.58 (dd, *J* = 2.6 Hz, *J* = 4.9 Hz, 1H, CHH), 2.66 (dd, *J* = 4.1 Hz, *J* = 4.7 Hz, 1H, CHH), 3.19-3.25 (m, 1H, CHO), 3.78 (dd, *J* = 5.7 Hz, *J* = 4.7 Hz, 1H, CHHO), 3.99 (dd, *J* = 5.7 Hz, *J* = 4.7 Hz, 1H, CHHO), 7.76 (dd, *J* = 3.3 Hz, *J* = 6.2 Hz, Ar-H), 8.11 (dd, *J* = 3.3 Hz, *J* = 6.2 Hz, Ar-H), 8.41 (s, 2H, Ar-H).

**<sup>13</sup>C NMR** (62.5 MHz, CDCl<sub>3</sub>) δ (ppm): 42.5 (CH<sub>2</sub>N), 68.8 (CH<sub>2</sub>O), 69.7 (CHO), 125.6 (C-Ar), 127.8 (C-Ar), 129.9 (C-Ar), 130.8 (C-Ar) 135.9 (C-Ar), 168.7 (NCO).

**FT-IR** (KBr) ( $\nu_{\max}$  / $\text{cm}^{-1}$ ): 1719, 1683, 1625, 1357, 1224, 764, 748.

**Anal. Calcd.** for  $\text{C}_{15}\text{H}_{11}\text{NO}_3$ : C, 71.14; H, 4.38; N, 5.53. Found: C, 71.20; H, 4.44; N, 5.63.

### 3-Amino-*N*-(2-chloroallyl)phthalimide (11)

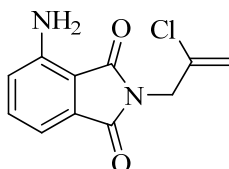

Reaction time: 6 h; Colorless solid; mp 149 °C; LC eluent: dichloromethane / ethyl ether 7:3; 89 % yield.

**$^1\text{H}$  NMR** (250 MHz,  $\text{CDCl}_3$ )  $\delta$  (ppm): 4.34 (s, 2H,  $\text{NCH}_2$ ), 5.36 (dd,  $J = 1.2$  Hz,  $J = 2.6$  Hz, 1H,  $\text{ClC}=\text{CHH}$ ), 5.50 (dd,  $J = 1.2$  Hz,  $J = 2.6$  Hz, 1H,  $\text{ClC}=\text{CHH}$ ), 7.06 (dd,  $J = 2.1$  Hz,  $J = 7.9$  Hz, 1H,  $H_4\text{-Ar}$ ), 7.23 (dd,  $J = 2.0$  Hz,  $J = 7.9$  Hz, 1H,  $H_6\text{-Ar}$ ), 7.66 (t,  $J = 8.0$  Hz, 1H,  $H_5\text{-Ar}$ )

**$^{13}\text{C}$  NMR** (62.5 MHz,  $\text{CDCl}_3$ )  $\delta$  (ppm): 44.9 ( $\text{NCH}_2$ ), 113.6 ( $\text{C}_6\text{-Ar}$ ), 113.9 ( $\text{C}=\text{CH}_2$ ), 119.2 ( $\text{C}_{2a}\text{Ar}$ ), 120.0 ( $\text{C}_4\text{-Ar}$ ), 132.4 ( $\text{C}_{6a}\text{-Ar}$ ), 137.5 ( $\text{C}_5\text{-Ar}$ ), 138.9 ( $\text{C}=\text{CH}_2$ ), 149.0 ( $\text{C}_3\text{-Ph}$ ), 171.1 ( $\text{NCO}$ ).

**FT-IR** (KBr) ( $\nu_{\max}$  / $\text{cm}^{-1}$ ): 3402, 3055, 1687, 1631, 1601, 1504, 1459, 995, 889.

**Anal. Calcd** for  $\text{C}_{11}\text{H}_9\text{ClN}_2\text{O}_2$ : C, 55.83; H, 3.83; N, 11.84. Found: C, 55.90; H, 3.87; N, 11.90.

### 4-(2-Chloroallylamino)phthalimide (12)

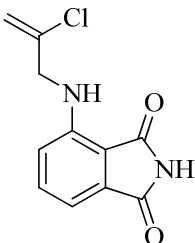

Reaction time: 6 h; Colorless solid; mp 167 °C; LC eluent: dichloromethane / ethyl ether 7:3; 72 % yield.

**$^1\text{H}$  NMR** (250 MHz,  $\text{CDCl}_3$ )  $\delta$  (ppm): 3.96 (dd,  $J = 1.2$  Hz,  $J = 1.3$  Hz, 2H,  $\text{NCH}_2$ ), 4.13 (bs, 1H,  $\text{NH}$ ), 5.35 (dd,  $J = 1.2$  Hz,  $J = 2.7$  Hz, 1H,  $\text{ClC}=\text{CHH}$ ), 5.46 (dd,  $J = 1.5$

Hz,  $J = 3.1$  Hz, 1H, ClC=CHH), 7.09 (dd,  $J = 2.1$  Hz,  $J = 7.9$  Hz, 1H,  $H_{4\text{-Ar}}$ ), 7.21 (dd,  $J = 2.0$  Hz,  $J = 7.9$  Hz, 1H,  $H_{6\text{-Ar}}$ ), 7.61 (t,  $J = 8.0$  Hz, 1H,  $H_{5\text{-Ar}}$ ), 9.88 (bs, CONH).

$^{13}\text{C}$  NMR (62.5 MHz,  $\text{CDCl}_3$ )  $\delta$  (ppm): 49.4 ( $\text{NCH}_2$ ), 113.9 ( $\text{C}_6\text{-Ar}$ ), 114.1 ( $\text{C}=\text{CH}_2$ ), 119.8 ( $\text{C}_{2\text{aAr}}$ ), 120.6 ( $\text{C}_4\text{-Ar}$ ), 132.7 ( $\text{C}_{6\text{aAr}}$ ), 137.4 ( $\text{C}_5\text{-Ar}$ ), 139.9 ( $\text{C}=\text{CH}_2$ ), 148.7 ( $\text{C}_3\text{-Ph}$ ), 171.0 (NCO).

**FT-IR** (KBr) ( $\nu_{\text{max}}/\text{cm}^{-1}$ ): 3332, 3056, 1685, 1634, 1611, 1506, 1460, 999, 884.

**Anal. Calcd** for  $\text{C}_{11}\text{H}_9\text{ClN}_2\text{O}_2$ : C, 55.83; H, 3.83; N, 11.84. Found: C, 55.86; H, 3.89; N, 11.93.

### 2-(2-Chloroallyl)-4-(2-chloroallylamino)phthalimide (13)

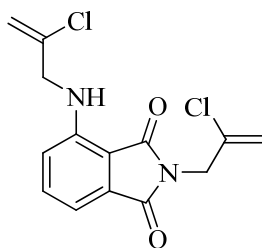

Reaction time: 6 h; Colorless solid; mp 205 °C; LC eluent: dichloromethane / ethyl ether 7:3; 7 % yield.

$^1\text{H}$  NMR (250 MHz,  $\text{CDCl}_3$ )  $\delta$  (ppm): 3.86 (dd,  $J = 1.2$  Hz,  $J = 1.3$  Hz, 2H,  $\text{HNCH}_2$ ), 4.32 (s, 2H,  $\text{CONCH}_2$ ), 5.36 (dd,  $J = 1.2$  Hz,  $J = 2.7$  Hz, 2H, ClC=CHH), 5.48 (dd,  $J = 1.5$  Hz,  $J = 3.1$  Hz, 2H, ClC=CHH), 7.11 (dd,  $J = 2.1$  Hz,  $J = 7.9$  Hz, 1H,  $H_{4\text{-Ar}}$ ), 7.31 (dd,  $J = 2.0$  Hz,  $J = 7.9$  Hz, 1H,  $H_{6\text{-Ar}}$ ), 7.70 (t,  $J = 8.0$  Hz, 1H,  $H_{5\text{-Ar}}$ ).

$^{13}\text{C}$  NMR (62.5 MHz,  $\text{CDCl}_3$ )  $\delta$  (ppm): 49.9 ( $\text{CONCH}_2$ ), 57.2 ( $\text{NHCH}_2$ ), 114.3 ( $\text{C}_6\text{-Ar}$ ), 114.9 ( $\text{C}=\text{CH}_2$ ), 119.8 ( $\text{C}_{2\text{aAr}}$ ), 121.8 ( $\text{C}_4\text{-Ar}$ ), 133.7 ( $\text{C}_{6\text{aAr}}$ ), 135.8 ( $\text{C}_5\text{-Ar}$ ), 140.2 ( $\text{C}=\text{CH}_2$ ), 148.6 ( $\text{C}_3\text{-Ph}$ ), 171.6 (NCO).

**FT-IR** (KBr) ( $\nu_{\text{max}}/\text{cm}^{-1}$ ): 3064, 1687, 1634, 1619, 1509, 1465, 994, 894.

**Anal. Calcd** for  $\text{C}_{14}\text{H}_{12}\text{Cl}_2\text{N}_2\text{O}_2$ : C, 54.04; H, 3.89; N, 9.00. Found: C, 55.10; H, 3.96; N, 8.91.



## References.

1. V. Pace, F. Martinez, M. Fernandez, J. V. Sinisterra and A. R. Alcántara, *Org. Lett.*, 2007, **9**, 2661.
2. J. Fraga-Dubreuil, G. Comak, A. W. Taylor and M. Poliakoff, *Green Chem.*, 2007, **9**, 1067.
3. K. Maruyama and Y. Kubo, *J. Org. Chem.*, 1981, **46**, 3612.
4. X. Sun, L. Zhou, W. Li and X. Zhang, *J. Org. Chem.*, 2008, **73**, 1143.
5. J. A. Lambertson, *Aust. J. Chem.*, 1954, **8**, 289.
6. J. K. Stille and Y. Becker, *J. Org. Chem.*, 1980, **45**, 2139.
7. S. A. Worlikar and R. C. Larock, *J. Org. Chem.*, 2008, **73**, 7175.
8. S. Hayat, R. Atta ur, M. Iqbal Choudhary, K. M. Khan, W. Schumann and E. Bayer, *Tetrahedron*, 2001, **57**, 9951.
9. M. Gelo and V. Sunjic, *Synthesis*, 1993, 855.
10. J. A. Heyes, D. Niculescu-Duvaz, R. G. Cooper and C. J. Springer, *J. Med. Chem.*, 2002, **45**, 99.
11. F. Martínez Lagos, J. D. Carballeira, J. L. Bermúdez, E. Alvarez and J. V. Sinisterra, *Tetrahedron: Asymmetry*, 2004, **15**, 763.
12. F. J. Williams and P. E. Donahue, *J. Org. Chem.*, 1977, **42**, 3414.
